# Supplementary material for: All-printed stretchable corneal sensor on soft contact lenses for noninvasive and painless ocular electrodiagnosis
Source: PubMed Central journal article supplement (PMC7943761; doi:10.1038/s41467-021-21916-8), 2021-03-09
Supplement: 41467_2021_21916_MOESM3_ESM.pdf [file 41467_2021_21916_MOESM3_ESM.pdf]

## **Description of Additional Supplementary Files**

File Name: Supplementary Movie S1

Description: Automated batch production (10 units per batch) using a computer-controlled dispenser-printing tool.

File Name: Supplementary Movie S2

Description: Stretching of the corneal sensor.

File Name: Supplementary Movie S3

Description: Folding and scrubbing of the corneal sensor

File Name: Supplementary Movie S4

Description: The participant wearing the corneal sensor with natural blinking and eye movements.

File Name: Supplementary Movie S5

Description: Real-time IR imaging during ERG recordings by using the corneal sensor.

File Name: Supplementary Movie S6

Description: Real-time IR imaging during ERG recordings by using the ERG-Jet lens.
